# Supplementary material
Source: ML conference proceedings conference paper supplement (https://openreview.net/forum?id=JxhgSAnrsG)
Supplement: supplementary_material [file attachment]

# Appendix

## A DATASETS DETAILS

To align with the requirements of VLM-based models, the necessary step is to transform all evaluation datasets into a textual format, specifically structured as question-answer pairs. In this section, we will delve deeper into the specifics of various datasets, including 3D object detection (§A.1), 3D lane detection (§A.2), driving captioning (§A.3), and ego planning (§A.4).

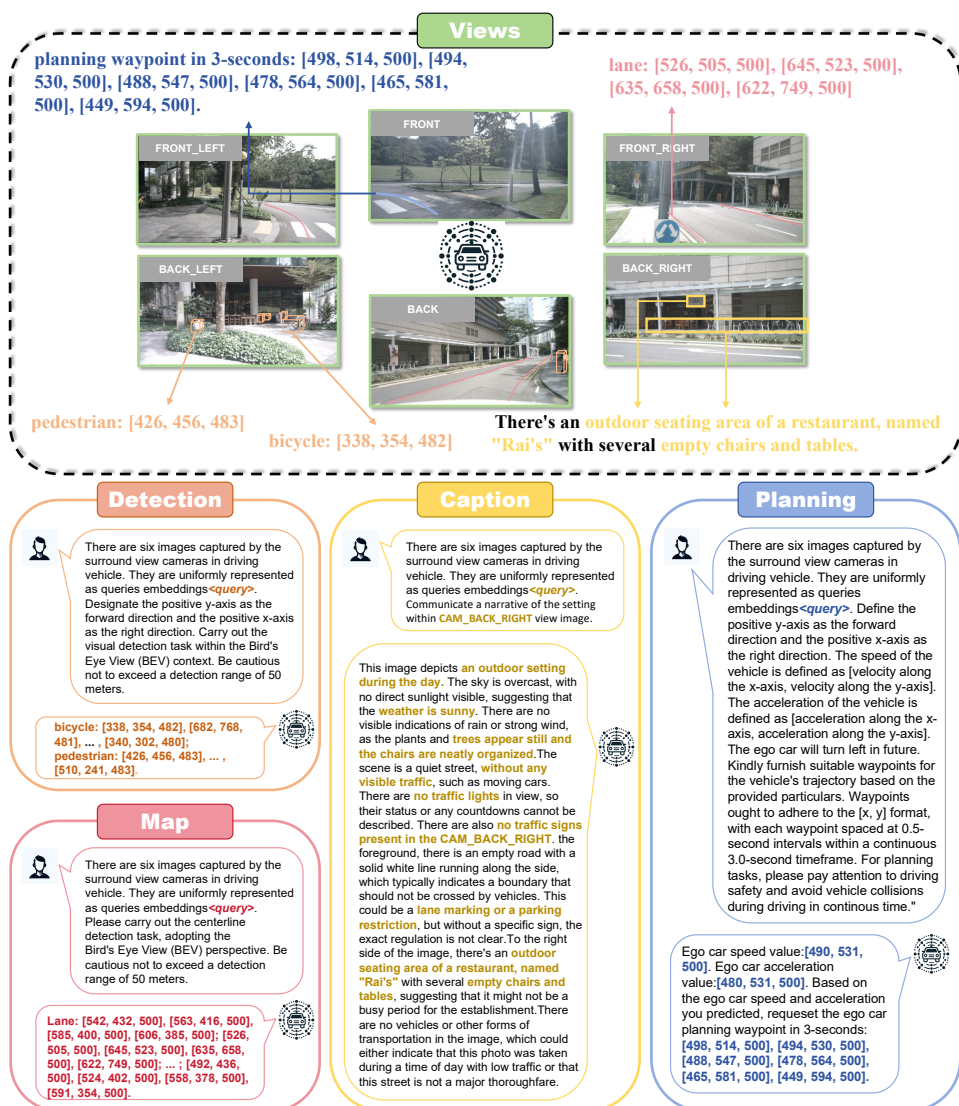

Figure 1: Our constructed question-answer pairs for VLM-based methods. It transforms several critical driving reasoning tasks, such as 3D object detection, map perception, environment caption, and ego-car planning, into a uniform text format.

### A.1 3D OBJECT DETECTION

The 3D object detection utilized in the VLM-based method (2D/3D visual tokenizers with LLM) evaluation is based on nuScenes (Caesar et al., 2020). To adapt to the inputs and outputs of LLM, we convert the detection task into a text-format question-answer task. Here, the question is randomly sampled from a pool that is listed in Table 1. As seen, we set a special token ‘<query>’ to accept tokens from 3D tokenizers. If the inputs are six-view images, we replace the text ‘They are uniformly represented as queries embeddings<query>’ in question with ‘They represent left rear image<query>, left front image<query>, direct front image<query>, right front image<query>, right rear image<query>, and direct rear image<query>.’. As for the answer, we choose the category name and 3D center points of each bounding box, as shown in Figure 1. To facilitate more efficient localization, we discretize the bird’s-eye view (BEV) space ranging from -50 meters to +50 meters into 1,000 bins.

- "There are six images captured by the surround view cameras in driving vehicle. They are uniformly represented as queries embeddings<query>. Define the positive y-axis as the forward direction and the positive x-axis as the right direction. Please complete the visual detection task under the Bird’s Eye View (BEV) perspective. Ensure that the detection range does not exceed 50 meters."
- "There are six images captured by the surround view cameras in driving vehicle. They are uniformly represented as queries embeddings<query>. Establish the positive y-axis as the frontward direction and the positive x-axis as the rightward direction. Kindly execute the visual detection task within the Bird’s Eye View (BEV) framework. Be mindful not to exceed a detection range of 50 meters."
- "There are six images captured by the surround view cameras in driving vehicle. They are uniformly represented as queries embeddings<query>. Set the forward direction as the positive y-axis and the right direction as the positive x-axis. Please carry out the visual detection task within the Bird’s Eye View (BEV) context. Ensure that the detection range remains within 50 meters."
- .....

Table 1: Question pool of 3D object detection for VLM-based methods.

### A.2 3D LANE DETECTION

We formulate a 3D lane detection dataset with question-answer pairs based on the OpenLane-V2 Subset-B (Wang et al., 2024), which itself originates from the nuScenes dataset. A representative is shown in Figure 1. Their questions are sampled from Table 2, and the corresponding answer comprises a set of four lane points. Analogous to the 3D object detection dataset, we discretize the BEV space, spanning from -50 meters to +50 meters, into 1,000 bins.

- "There are six images captured by the surround view cameras in driving vehicle. They are uniformly represented as queries embeddings<query>. Please complete the centerline detection task under the Bird’s Eye View (BEV) perspective. Ensure that the detection range does not exceed 50 meters."
- "There are six images captured by the surround view cameras in driving vehicle. They are uniformly represented as queries embeddings<query>. Be mindful not to exceed a detection range of 50 meters."
- "There are six images captured by the surround view cameras in driving vehicle. They are uniformly represented as queries embeddings<query>. Could you complete the task of detecting the centerline from the Bird’s Eye View (BEV) perspective? Ensure that the detection range remains within 50 meters."
- .....

Table 2: Question pool of 3D lane detection for VLM-based methods.

### A.3 DRIVING CAPTIONING

Our driving captioning dataset is created through the annotation of nuScenes, leveraging the capabilities of GPT-4V. The specific prompt utilized in GPT-4V is detailed in Table 3, while an illustrative example is presented in Figure 1. It is worth mentioning that, to harness the full potential of GPT-4V, we request a unique description for each individual view, resulting in a total of approximately 180k question-answer pairs.

- "Describe the current traffic conditions. If there are traffic lights in the image, describe the status of all the traffic lights, including any countdowns; if there are none, please do not respond. If there are traffic signs in the picture, identify and explain each one; if there are none, no explanation is necessary. If there are other vehicles in the picture, describe them in more detail. Please ensure the answer does not exceed 600 words. Answers must be in English."

Table 3: Prompt used in GPT-4V for caption generation.

### A.4 EGO PLANNING

Similar to 3D object and lane detection, we adapt the nuScenes dataset into a question-answer pairs format. Following the chain-of-thought approach, we prompt our model to generate safe driving plans and to describe various ego states, such as velocity and acceleration. The specific questions used are sampled from Table 4. For the answers, the model predicts the current state’s velocity and acceleration and then generates the ego-car’s planning waypoints for the next 3 seconds at 0.5-second intervals. This approach mirrors our methods in 3D object detection and 3D lane detection, where we discretize the BEV space, which ranges from -50 to +50 meters, into 1,000 bins. Similarly, we discretize both velocity and acceleration across a range from -50 m/s ( $m/s^2$ ) to +50 m/s ( $m/s^2$ ) into 1,000 bins each.

## B MODEL DETAILS

### B.1 3D TOKENIZERS PRE-TRAINING

We pre-train two distinct 3D tokenizers: StreamPETR (Wang et al., 2023) and TopoMLP (Wu et al., 2024). StreamPETR (Wang et al., 2023) is designed for multi-view 3D object detection. We utilize a ViT-L backbone (Fang et al., 2023) and process images at a high resolution of 800x1600. Moreover, we follow the official training schedule established for the nuScenes dataset. TopoMLP (Wu et al., 2024) focuses on constructing vectorized maps from multiple views. To maintain methodological consistency with StreamPETR, we employ the same ViT-L backbone and resolution. The training strategy for TopoMLP also mirrors the official.

### B.2 3D-TOKENIZED LLM

**Query Representation.** For the innate priors of the 3D physical world, the query-based BEV framework is introduced. These DETR-style methods, StreamPETR and TopoMLP, extract target-aware query embeddings aka query representations (content) with reference points (localization) to represent objects from multi-view images.

**Reference Point Embeddings.** As previously mentioned, a target is characterized by both its content and location. We integrate the query embeddings by adding reference point embeddings, which are generated from reference points via a single linear layer, to formulate the 3D tokens that represent target information. *A notable aspect of our setup is we initialize the weight of the reference point projector to zero.*

**Memory Queue.** Taking inspiration from StreamPETR, our approach involves the storage of historical queries to preserve continuity in time, as memory queues. Specifically, we concatenate these memory queries with current queries for temporal modeling. To elaborate, our method includes storing queries from three additional frames that exhibit the highest confidence—specifically, the top-K

162  
163  
164  
165  
166  
167  
168  
169  
170  
171  
172  
173  
174  
175  
176  
177  
178  
179  
180  
181  
182  
183  
184  
185  
186  
187  
188  
189  
190  
191  
192  
193  
194  
195  
196  
197  
198  
199  
200  
201  
202  
203  
204  
205  
206  
207  
208  
209  
210  
211  
212  
213  
214  
215

- "The six images include objects that are uniformly represented as 3D detection query embeddings<query> and map query embeddings<query>. Define the positive y-axis as the forward direction and the positive x-axis as the right direction. The speed of the vehicle is defined as [velocity along the x-axis, velocity along the y-axis]. The acceleration of the vehicle is defined as [acceleration along the x-axis, acceleration along the y-axis]. The ego car will turn left in future. Kindly furnish suitable waypoints for the vehicle's trajectory based on the provided particulars. Waypoints ought to adhere to the [x, y] format, with each waypoint spaced at 0.5-second intervals within a continuous 3.0-second timeframe. For planning tasks, please pay attention to driving safety and avoid vehicle collisions during driving in continuous time. "
- "The six images include objects that are uniformly represented as 3D detection query embeddings<query> and map query embeddings<query>. Define the positive y-axis as the forward direction and the positive x-axis as the right direction. The speed of the vehicle is defined as [velocity along the x-axis, velocity along the y-axis]. The acceleration of the vehicle is defined as [acceleration along the x-axis, acceleration along the y-axis]. The ego car will turn right in future. We request your provision of pertinent waypoints for the vehicle's route in accordance with the given information. Waypoints should conform to the format [x, y], with spacing set at 0.5-second intervals over a continuous duration of 3.0 seconds. For planning tasks, please pay attention to driving safety and avoid vehicle collisions during driving in continuous time. "
- "The six images include objects that are uniformly represented as 3D detection query embeddings<query> and map query embeddings<query>. Define the positive y-axis as the forward direction and the positive x-axis as the right direction. The speed of the vehicle is defined as [velocity along the x-axis, velocity along the y-axis]. The acceleration of the vehicle is defined as [acceleration along the x-axis, acceleration along the y-axis]. The ego car will go stright in future. Please submit fitting waypoints for the vehicle's course based on the supplied data. Ensure waypoints are structured as [x, y] and spaced at intervals of 0.5 seconds across a continuous 3.0-second period. For planning tasks, please pay attention to driving safety and avoid vehicle collisions during driving in continuous time. "
- .....

Table 4: Question pool of ego planning for VLM-based methods.

queries, where in our implementation, K is set to 256. The management of these queues adheres to a first-in, first-out (FIFO) principle.

Our 3D-tokenized LLM, Atlas, integrates the 3D tokenizers described earlier with an LLM, specifically the Vicuna-1.5. This LLM has been pre-trained on a diverse open-world data corpus, providing a robust foundation for understanding and processing spatial-temporal. Atlas follows most of the basic settings in Merlin, with a batch size of 1, a learning rate of 2e-5, and the AdamW optimizer with a weight decay of 1e-4. We implement a linear warm-up phase consisting of the first 3% steps in total. Following the warm-up, we transition to a cosine learning rate strategy. The maximum length of prompt tokens is 4096.

## C 3D DETECTION RESULTS

**Precision-Recall Curve.** In the paper text, we present a comparison of the F1 scores between task-specific models and Atlas in 3D detection, focusing on predictions with a confidence score above 0.3, which yielded the highest F1 score. Additionally, we illustrate the performance variations of PETR, StreamPETR, and Atlas through the Precision-Recall curves at different positive thresholds, as shown in Figure 2. It's important to note that Atlas does not generate confidence scores; therefore, we treated all its predictions as positive samples for the purpose of calculating precision and recall. Although Atlas shows slightly weaker performance in making fine-grained predictions (specifically at a threshold of 0.5 meters), it excels in scenarios with larger thresholds. This observation suggests that large language models like Atlas might struggle with highly precise numerical predictions but perform well when broader tolerances are acceptable.

216  
 217  
 218  
 219  
 220  
 221  
 222  
 223  
 224  
 225  
 226  
 227  
 228  
 229  
 230  
 231  
 232  
 233  
 234  
 235  
 236  
 237  
 238  
 239  
 240  
 241  
 242  
 243  
 244  
 245  
 246  
 247  
 248  
 249  
 250  
 251  
 252  
 253  
 254  
 255  
 256  
 257  
 258  
 259  
 260  
 261  
 262  
 263  
 264  
 265  
 266  
 267  
 268  
 269

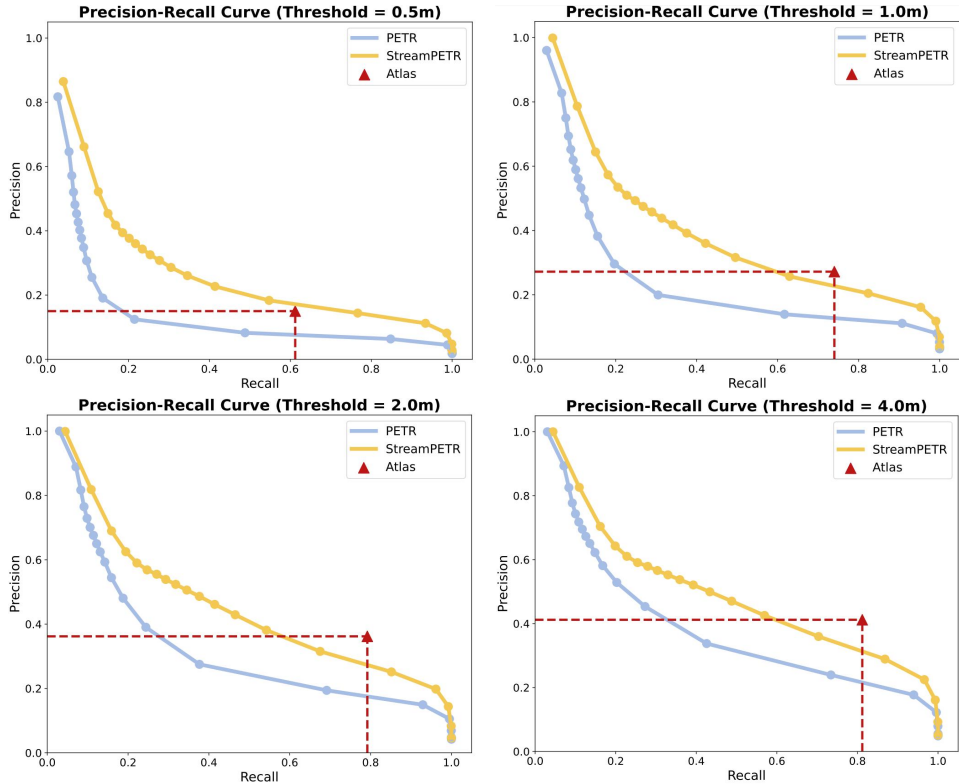

Figure 2: **Compare of 3D detection with various thresholds.** We provide the precision-recall curves of PETR and StreamPETR. As the predictions from Atlas do not include confidence scores, we calculate the precision and recall across all predicted samples.

## D MORE QUALITATIVE RESULTS

### D.1 QUALITATIVE RESULTS OF 3D DETECTION

We visualize the prediction results of the Atlas model in 3D detection tasks, as shown in Figure 3. The results align well with our performance metrics, demonstrating a notably high recall rate. This high recall is particularly important in practical applications of autonomous driving, where accurately detecting every potential obstacle, like pedestrians, is critical. Furthermore, the model maintains its accuracy even in complex scenarios characterized by high pedestrian density or closely packed targets. Moreover, Atlas proves robust under challenging environmental conditions. For instance, even on rainy days, the model continues to perform strongly. This resilience is essential for the reliability needed in real-world applications, ensuring consistent performance regardless of weather conditions.

### D.2 QUALITATIVE RESULTS OF 3D LANE DETECTION

We showcase the visualization outcomes of Atlas in its application to 3D lane detection, depicted in Figure 4. While the quantitative performance does not surpass task-specific models, Atlas demonstrates noteworthy qualitative performance. As seen, our model performs well in challenging road situations because it accurately recognizes road crossings and dividings.

### D.3 QUALITATIVE RESULTS OF PLANNING

We also demonstrated the adaptability of Atlas’s driving plans across various weather conditions in Figure 5. Notably, even during rain, Atlas effectively plans its future travel trajectories with considerable diversity. This capability underscores the model’s robustness in challenging environments.

270  
 271  
 272  
 273  
 274  
 275  
 276  
 277  
 278  
 279  
 280  
 281  
 282  
 283  
 284  
 285  
 286  
 287  
 288  
 289  
 290  
 291  
 292  
 293  
 294  
 295  
 296  
 297  
 298  
 299  
 300  
 301  
 302  
 303  
 304  
 305  
 306  
 307  
 308  
 309  
 310  
 311  
 312  
 313  
 314  
 315  
 316  
 317  
 318  
 319  
 320  
 321  
 322  
 323

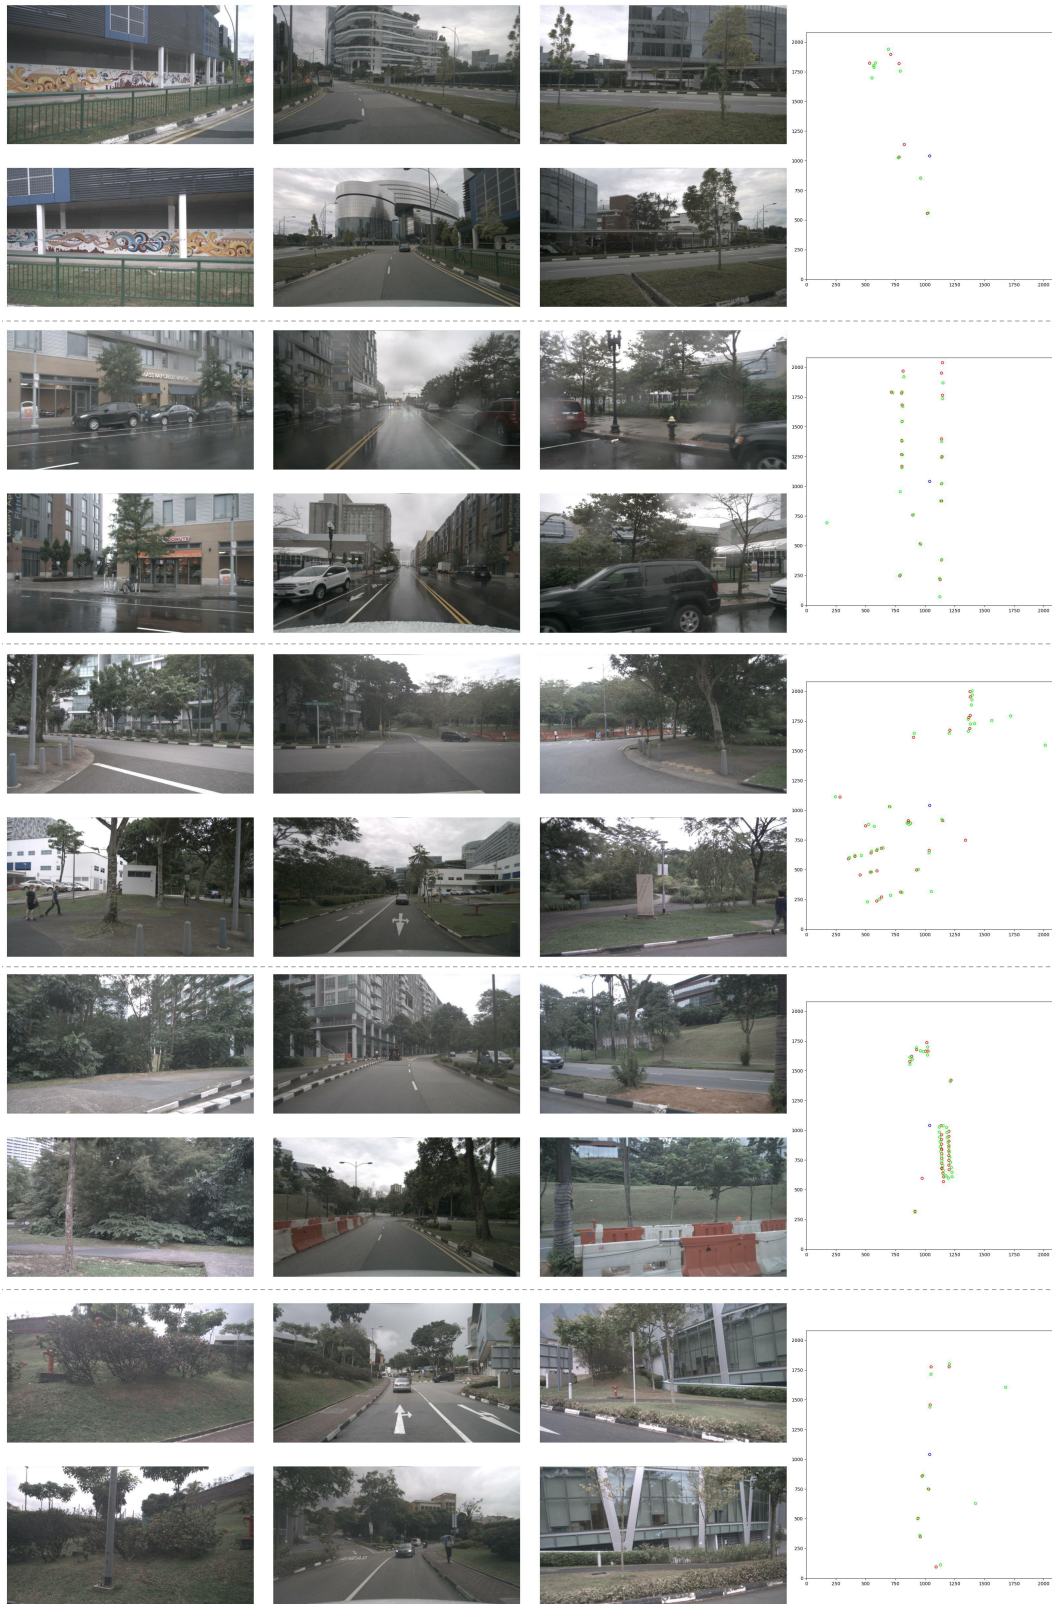

Figure 3: **Qualitative results of Atlas on 3D object detection.** The red circles represent the predicted objects and green circles represent the ground truth.

324  
 325  
 326  
 327  
 328  
 329  
 330  
 331  
 332  
 333  
 334  
 335  
 336  
 337  
 338  
 339  
 340  
 341  
 342  
 343  
 344  
 345  
 346  
 347  
 348  
 349  
 350  
 351  
 352  
 353  
 354  
 355  
 356  
 357  
 358  
 359  
 360  
 361  
 362  
 363  
 364  
 365  
 366  
 367  
 368  
 369  
 370  
 371  
 372  
 373  
 374  
 375  
 376  
 377

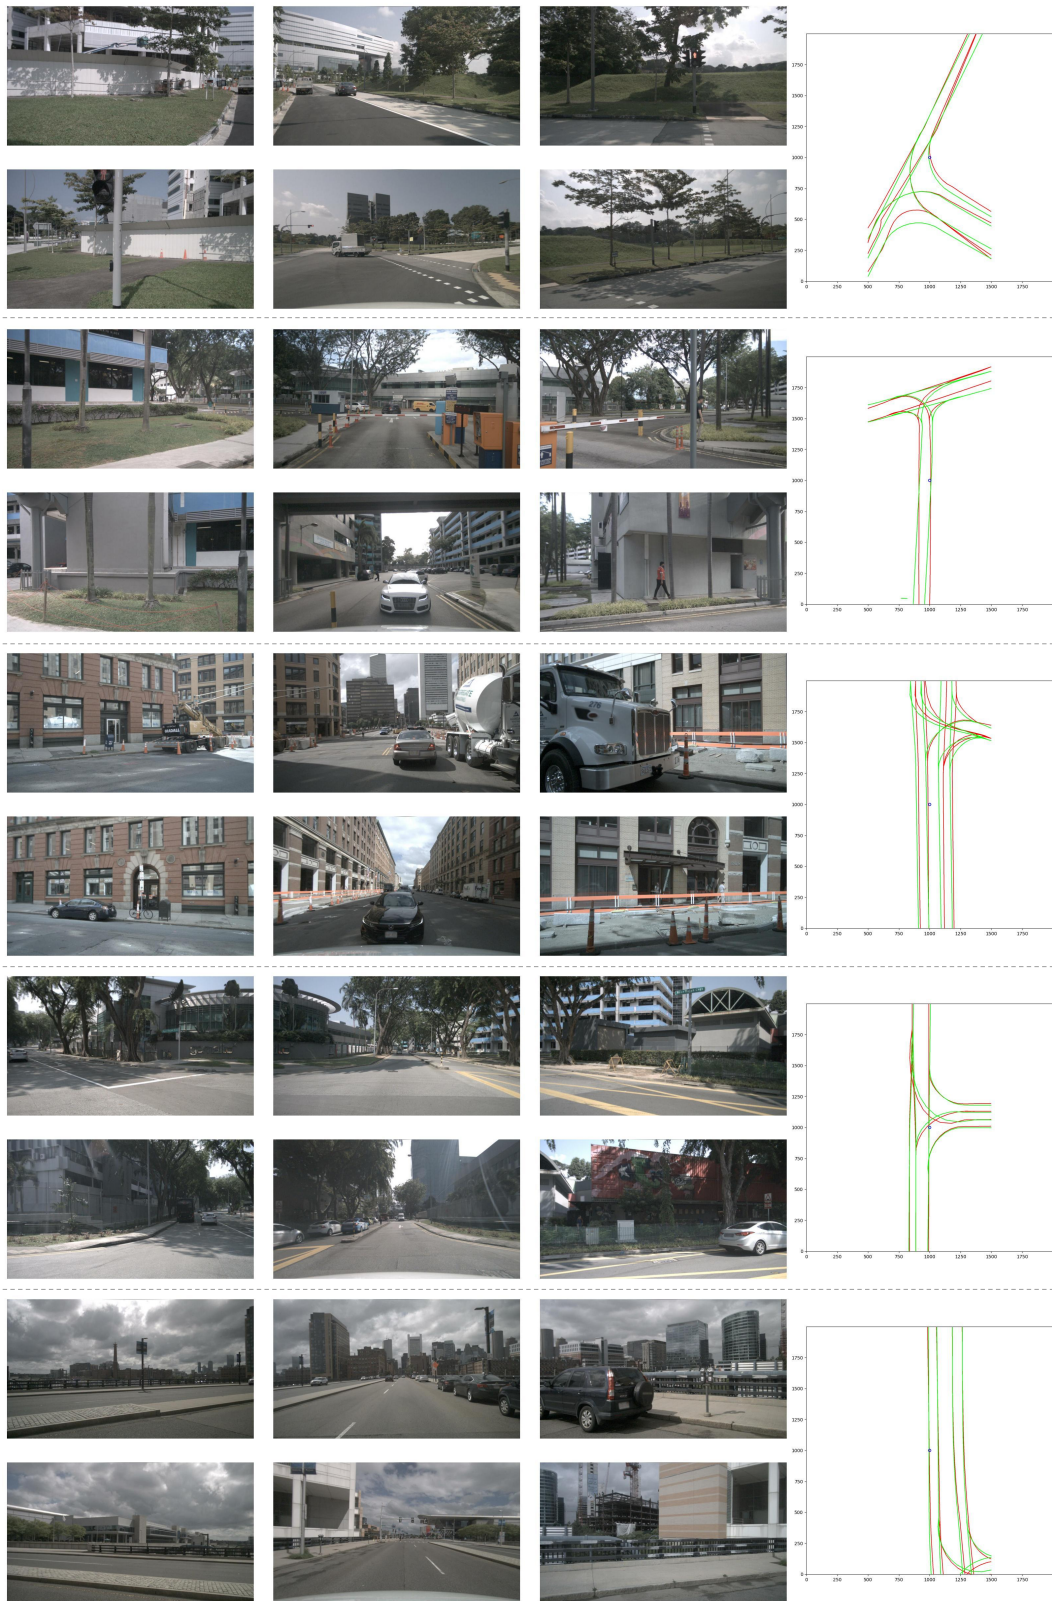

Figure 4: **Qualitative results of Atlas on map detection.** The red represent the predicted lane and green represent the ground truth.

378  
379  
380  
381  
382  
383  
384  
385  
386  
387  
388  
389  
390  
391  
392  
393  
394  
395  
396  
397  
398  
399  
400  
401  
402  
403  
404  
405  
406  
407  
408  
409  
410  
411  
412  
413  
414  
415  
416  
417  
418  
419  
420  
421  
422  
423  
424  
425  
426  
427  
428  
429  
430  
431

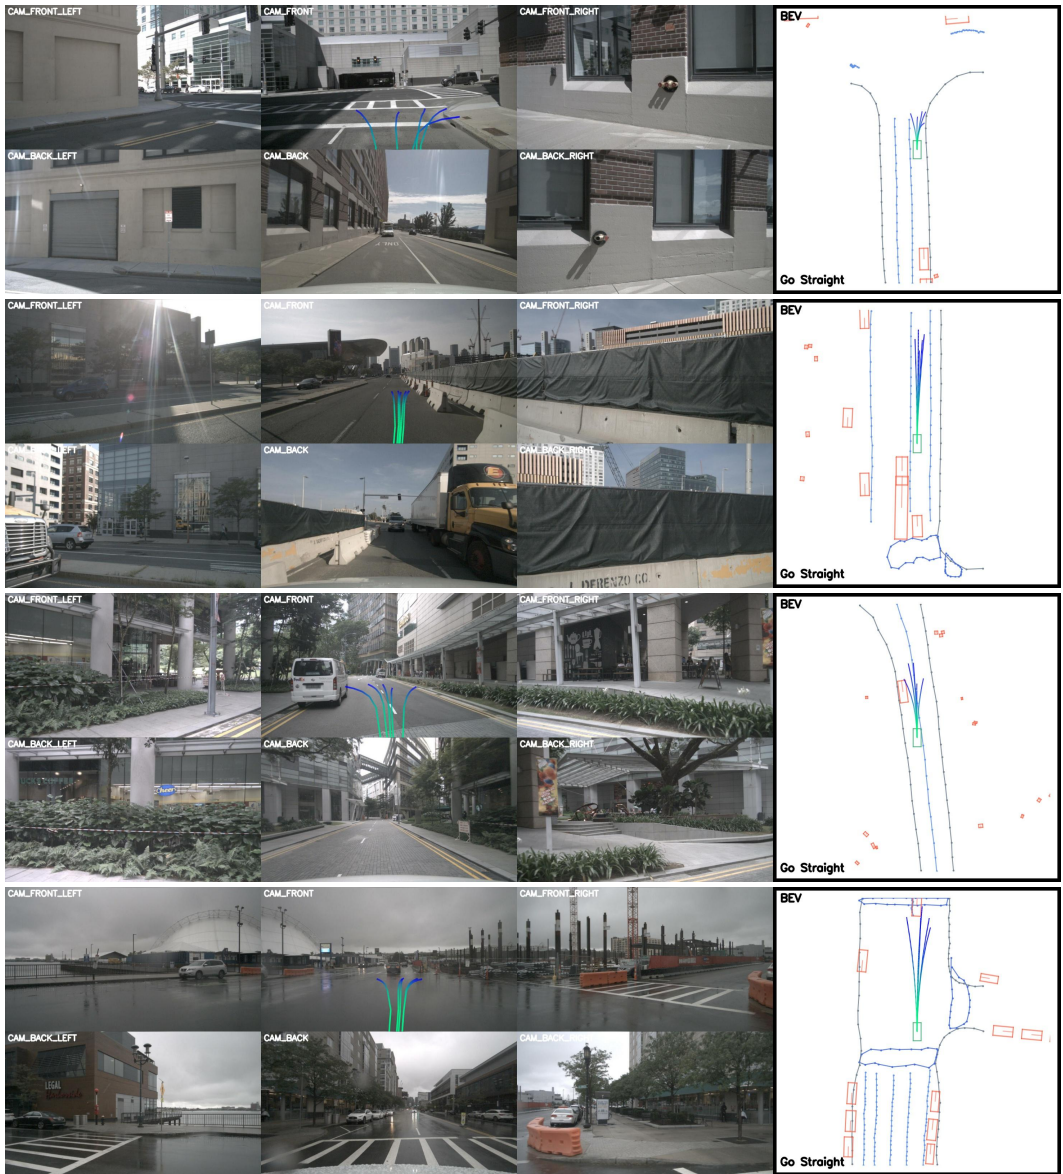

Figure 5: **Qualitative results of Atlas on ego-car planning.** Atlas outputs multiple potential planning trajectories within diverse weather and scenarios.



Furthermore, Atlas impressively maintains compliance with traffic signals, such as stopping at red lights, without having undergone specific training for traffic light recognition. This aspect highlights the model’s inherent understanding and application of world knowledge relying on LLM. Additionally, the model’s diverse planning strategy enables it to effectively balance the decisions between maintaining its current lane and executing lane changes for overtaking. This flexibility greatly enhances the variety of possible travel routes, adapting dynamically to the flow of traffic and road conditions.

## E FAILURE CASES

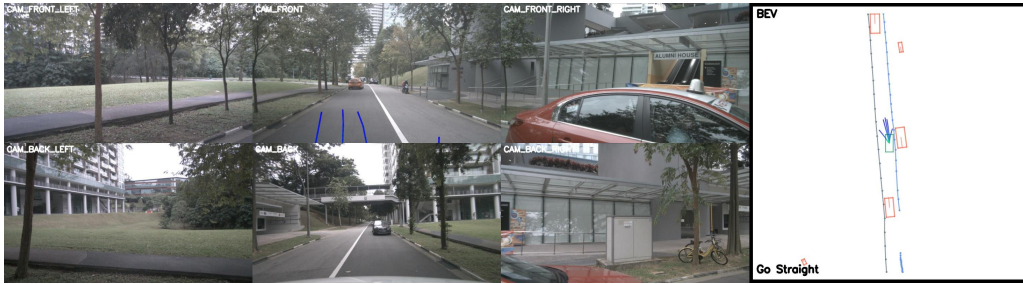

Figure 6: Overly conservative

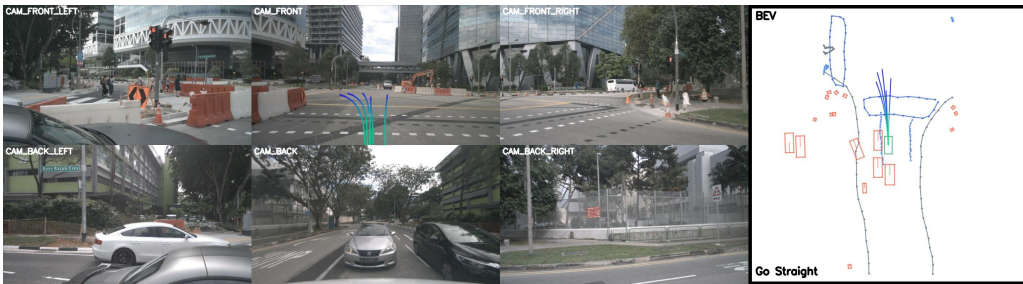

Figure 7: Violation of traffic regulations

Discussing error examples in our model, Atlas, provides valuable insights that can guide future improvements. In this section, we analyze two primary types of failure observed during our experiments:

**Overly Conservative Behavior.** Atlas tends to make overly conservative decisions, favoring caution even when the path ahead is clear, as shown in Figure 6. This behavior results in a lower travel efficiency as the model opts to prioritize safety excessively. Our analysis suggests that this conservatism is likely rooted in the sampling bias of the nuScenes dataset. This dataset predominantly includes safer driving examples and favors lower-speed scenarios, which may have influenced Atlas’ decision-making strategy. To address this issue, incorporating a substantial amount of closed-loop data could be beneficial. This would provide Atlas with more dynamic and varied driving scenarios, potentially reducing its overly conservative tendencies.

**Violation of Traffic Regulations.** Despite Atlas having learned to adhere to several traffic rules, it occasionally fails to comply with traffic light signals, as shown in Figure 7. Specifically, Atlas may proceed through intersections during a red light. This error stems from the model’s lack of explicit traffic light information in its current framework. To mitigate this issue, integrating enhanced traffic-related data queries could be crucial. By providing Atlas with more explicit and detailed traffic signal information, we can improve its compliance with traffic laws and overall decision-making accuracy.

These findings highlight critical areas for further research and development. Enhancing the dataset and incorporating explicit models of traffic elements such as lights and signs are promising avenues for improving Atlas’ performance and reliability.

486  
487  
488  
489  
490  
491  
492  
493  
494  
495  
496  
497  
498  
499  
500  
501  
502  
503  
504  
505  
506  
507  
508  
509  
510  
511  
512  
513  
514  
515  
516  
517  
518  
519  
520  
521  
522  
523  
524  
525  
526  
527  
528  
529  
530  
531  
532  
533  
534  
535  
536  
537  
538  
539

---

## REFERENCES

- Holger Caesar, Varun Bankiti, Alex H Lang, Sourabh Vora, Venice Erin Liong, Qiang Xu, Anush Krishnan, Yu Pan, Giancarlo Baldan, and Oscar Beijbom. nuscenes: A multimodal dataset for autonomous driving. In *CVPR*, 2020. 2
- Yuxin Fang, Quan Sun, Xinggang Wang, Tiejun Huang, Xinlong Wang, and Yue Cao. Eva-02: A visual representation for neon genesis. *arXiv preprint arXiv:2303.11331*, 2023. 3
- Huijie Wang, Tianyu Li, Yang Li, Li Chen, Chonghao Sima, Zhenbo Liu, Bangjun Wang, Peijin Jia, Yuting Wang, Shengyin Jiang, et al. Openlane-v2: A topology reasoning benchmark for unified 3d hd mapping. *NeurIPS*, 2024. 2
- Shihao Wang, Yingfei Liu, Tiancai Wang, Ying Li, and Xiangyu Zhang. Exploring object-centric temporal modeling for efficient multi-view 3d object detection. In *ICCV*, 2023. 3
- Dongming Wu, Jiahao Chang, Fan Jia, Yingfei Liu, Tiancai Wang, and Jianbing Shen. Topomlp: An simple yet strong pipeline for driving topology reasoning. In *ICLR*, 2024. 3
